# Supplementary material for: Health Literacy and Awareness of Atrial Fibrillation
Source: PubMed Central journal article supplement — J Am Heart Assoc. 2017 Apr 11;6(4):e005128. doi: 10.1161/JAHA.116.005128 (PMC5533014; doi:10.1161/jaha.116.005128), 2017-04-11
Supplement: JAH3-6-e005128-s001.pdf [file JAH3-6-e005128-s001.pdf]

## **SUPPLEMENTAL MATERIAL**

### **ATRIA-CVRN Members:**

**Kaiser Permanente Northern California, Division of Research, Oakland, CA:** Alan S. Go (PI), Joan C. Lo, Sue Hee Sung, Niela Pomernacki, Grace Tabada, Natalia Udaltsova

**Massachusetts General Hospital, Division of General Internal Medicine, Boston, MA:** Daniel E. Singer (PI), Yuchiao Chang, Leila Borowsky

**Kaiser Permanente Southern California, Department of Research and Evaluation, Pasadena, CA:** Kristi Reynolds (Site PI),-Albert Yuh Jer Shen, Mary Helen Black, Teresa N. Harrison, Rong Wei, Denison Ryan, Kimberly Cannavale

**University of California San Francisco, Division of Hospital Medicine, San Francisco, CA:** Margaret C. Fang (Site PI)
